# Supplementary material for: Highly luminescent CuInS2–ZnS nanocrystals: achieving phase transfer and nuclear homing property simultaneously through simple TTAB modification
Source: Royal Society of Chemistry journal article supplement (doi:10.1039/c2jm35261c), 2012-01-01
Supplement: c2jm35261c.pdf [file c2jm35261c.pdf]

## Supplementary Information

Highly luminescent CuInS<sub>2</sub>-ZnS nanocrystals: achieving phase transfer and nuclear homing property simultaneously through simple TTAB modification

Meina Wang, Xiangyou Liu, Chuanbao Cao and Long Wang

**Table S1.** Analysis of the compositions of CIS and CIS-ZnS nanocrystals.

| Sample  | Analytical method          | Chemical component |        |        |       |
|---------|----------------------------|--------------------|--------|--------|-------|
|         |                            | Cu                 | In     | Zn     | S     |
| CIS     | Atomic composition (%) [a] | 28.59              | 23.12  | N.D.   | 48.29 |
|         | Elemental content (μM) [b] | 125.26             | 113.84 | N.D.   | ---   |
| CIS-ZnS | Atomic composition (%)     | 16.40              | 13.86  | 14.13  | 55.61 |
|         | Elemental content (μM)     | 127.08             | 118.79 | 123.35 | ---   |

[a] Estimated from EDS spectra. [b] Measure by ICP-AES which was only used to determine the metal elements. "N.D." means not detected.

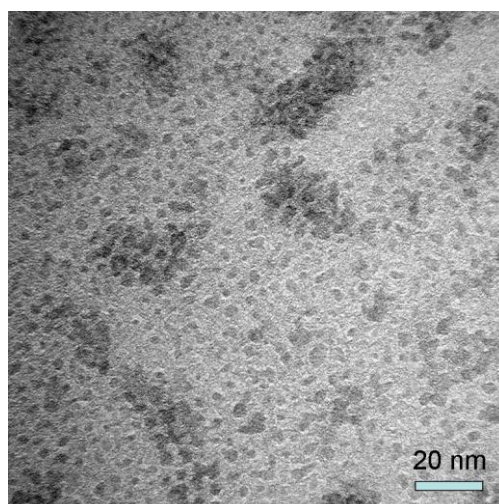

**Fig. S1** TEM image of CIS-ZnS-MPA nanocrystals.

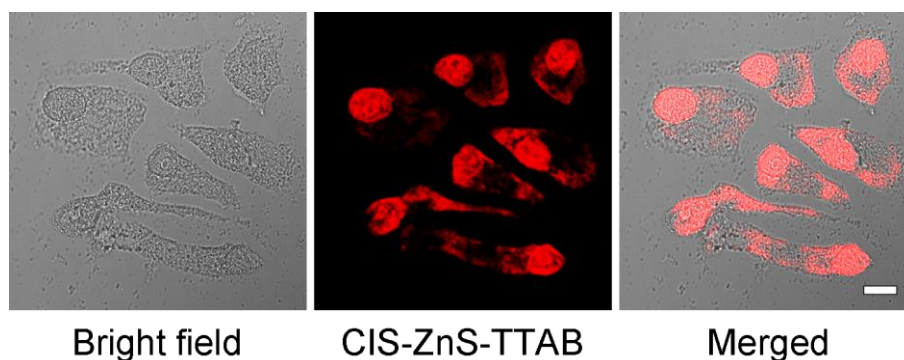

**Fig. S2** Images of HepG2 cells taken after they were treated with CIS-ZnS-TTAB nanocrystals (~500 μM) for 6 h. Scale bars: 10 μm.
